# Supplementary material for: Information can explain the dynamics of group order in animal collective behaviour
Source: PubMed Central journal article supplement (PMC7264142; doi:10.1038/s41467-020-16578-x), 2020-06-01
Supplement: 41467_2020_16578_MOESM3_ESM.pdf [file 41467_2020_16578_MOESM3_ESM.pdf]

### **Description of Additional Supplementary Files**

File Name: Supplementary Data 1

Description: Individual-level variables used in the analyses of the likelihood to respond first to the stimulus.

File Name: Supplementary Data 2

Description: Group-level variables used in the analyses of the latency to first respond to the stimulus and collective visual field data.

File Name: Supplementary Data 3

Description: Variables used in the analyses of the latency to arrive at the stimulus.

File Name: Supplementary Data 4

Description: Individual-level variables used in the analysis of the heading angle to nearest neighbours.

File Name: Supplementary Data 5

Description: Data on food item consumption.

File Name: Supplementary Movie 1

Description: Examples of responses to the stimulus from groups with low levels of collective order and high levels of collective order.

File Name: Supplementary Movie 2

Description: Illustration of the effects of different levels of collective order for the proportion of the arena within the visual range of a group based on a binocular (30°) field of view.
